# Supplementary material for: Feasibility and Acceptability of a Strategy Deploying Multiple First-Line Artemisinin-Based Combination Therapies for Uncomplicated Malaria in the Health District of Kaya, Burkina Faso
Source: MDPI journal article supplement (doi:10.3390/tropicalmed8040195), 2023-03-28
Supplement: s1 [file s1]

**Supplementary Table S2: Sociodemographic characteristics of study participants during the qualitative survey**

|                                      | Number | Percentage (%) |
|--------------------------------------|--------|----------------|
| <b>Age of respondents (years)</b>    |        |                |
| ≤ 25                                 | 73     | 19.0           |
| 26-35                                | 104    | 27.1           |
| 36-55                                | 171    | 44.5           |
| > 55                                 | 36     | 9.4            |
| <b>Sex of respondents</b>            |        |                |
| Female                               | 163    | 42.5           |
| Male                                 | 221    | 57.5           |
| <b>Residence area of respondents</b> |        |                |
| Rural                                | 316    | 82.3           |
| Urban                                | 68     | 17.7           |
| <b>Education level</b>               |        |                |
| None                                 | 197    | 51.3           |
| Informal education                   | 24     | 6.2            |
| Primary                              | 31     | 8.1            |
| Secondary and higher                 | 132    | 34.4           |
