# Supplementary material for: Feasibility and Acceptability of a Strategy Deploying Multiple First-Line Artemisinin-Based Combination Therapies for Uncomplicated Malaria in the Health District of Kaya, Burkina Faso
Source: MDPI journal article supplement (doi:10.3390/tropicalmed8040195), 2023-03-28
Supplement: s1 [file s1]

**Supplementary Table S1: Study drugs regimen used in this MFT pilot programme**

***Pyronaridine-Artesunate***

Recommended dosage of fixed combination of Pyronaridine-Artesunate granule 20/60 mg for children under five years of age

| Weight   | Presentations                          | Day 1     | Day 2     | Day 3     |
|----------|----------------------------------------|-----------|-----------|-----------|
| 5-<8 kg  | Pyronaridine 20 mg<br>Artesunate 60 mg | 1 sachet  | 1 sachet  | 1 sachet  |
| 8-<15kg  | Pyronaridine 20 mg<br>Artesunate 60 mg | 2 sachets | 2 sachets | 2 sachets |
| 15-<20kg | Pyronaridine 20 mg<br>Artesunate 60 mg | 3 sachets | 3 sachets | 3 sachets |

***Dihydroartemisinin-Piperaquine***

Recommended dosage of fixed combination Dihydroartemisinin-Piperaquine (40/320) for five years of age children and above

| Weight (age)             | Presentation/dosage                           | Day 1         | Day 2         | Day 3         |
|--------------------------|-----------------------------------------------|---------------|---------------|---------------|
| 17 -<25 kg (5-8 years)   | Dihydroartemisinin 40mg+<br>Piperaquine 320mg | 1+1/2 tablets | 1+1/2 tablets | 1+1/2 tablets |
| 25 -<36 kg (8 -15 years) | Dihydroartemisinin 40mg+<br>Piperaquine 320mg | 2 tablets     | 2 tablets     | 2 tablets     |
| 36 -<60 kg (≥15 years)   | Dihydroartemisinin 40mg+<br>Piperaquine 320mg | 3 tablets     | 3 tablets     | 3 tablets     |
| 60 -<80 kg (≥15 years)   | Dihydroartemisinin 40mg+<br>Piperaquine 320mg | 4 tablets     | 4 tablets     | 4 tablets     |
| ≥80kg (≥15 years)        | Dihydroartemisinin 40mg+<br>Piperaquine 320mg | 5 tablets     | 5 tablets     | 5 tablets     |

**Artemether-lumefantrine**

Recommended dosage of fixed combination Artemether-Lumefantrine (80/480 mg) for pregnant women

| Weight (age)           | Presentations                           | Day 1     | Day 2     | Day 3     |
|------------------------|-----------------------------------------|-----------|-----------|-----------|
| ≥35 kg<br>(≥ 12 years) | Artemether 80 mg<br>Lumefantrine 480 mg | 1tb x 2/D | 1tb x 2/D | 1tb x 2/D |
| <u>Adult</u>           | Artemether 80 mg<br>Lumefantrine 480 mg | 1tb x 2/D | 1tb x 2/D | 1tb x 2/D |

**D : day      tb : tablet**
